# Supplementary material for: Single atom-doped arsenene as electrocatalyst for reducing nitrogen to ammonia: a DFT study
Source: Royal Society of Chemistry journal article supplement (doi:10.1039/d0cp04315j), 2020-01-01
Supplement: d0cp04315j1.pdf [file d0cp04315j1.pdf]

Electronic Supplementary Information (ESI)

**Single Atom Doped Arsenene as Elecocatalysts for Reducing Nitrogen to  
Ammonia: A DFT Study**

Ziwei Xu, #,\* Ruofei Song, # Mingyuan Wang, Xiangzhao Zhang, Guiwu Liu and

Guanjun Qiao

*School of Materials Science and Engineering, Jiangsu University, 212013 Zhenjiang,*

*China*

\*Corresponding Author, E-mail address: [ziweixu2014@ujs.edu.cn](mailto:ziweixu2014@ujs.edu.cn)

# These authors contributed equally to this study.

**Table S1** The average bond lengths of metal-As.

| <b>Metal (m)</b> | <b><math>d_{m-As}</math> (Å)</b> |
|------------------|----------------------------------|
| V                | 2.47                             |
| Cr               | 2.46                             |
| Fe               | 2.39                             |
| Co               | 2.27                             |
| Cu               | 2.37                             |
| Ru               | 2.36                             |
| Pd               | 2.44                             |
| Ag               | 2.54                             |
| Pt               | 2.41                             |
| Au               | 2.49                             |

**Table S2** The band gap values (DFT-PBE level) of TM doped arsenene.

| <b>TM/Ars</b> | <b>Band gap value (eV)</b> |
|---------------|----------------------------|
| V/Ars         | ~ 0.00                     |
| Cr/Ars        | 0.78                       |
| Fe/Ars        | ~ 0.00                     |
| Co/Ars        | 0.66                       |
| Cu/Ars        | ~ 0.00                     |
| Ru/Ars        | 0.25                       |
| Pd/Ars        | ~ 0.00                     |
| Ag/Ars        | ~ 0.00                     |
| Pt/Ars        | ~ 0.00                     |
| Au/Ars        | ~ 0.00                     |

**Table S3** The Gibbs free energies change of N<sub>2</sub> adsorption with the most favorable manner, and the distant of N-N bond. Bader charge for TM-doped system and N<sub>2</sub> molecule.

| <b>Metal (m)</b> | $d_{N-N}$ (Å) | $Q_{system-N_2}$ (e) |
|------------------|---------------|----------------------|
| <b>V</b>         | 1.13          | 0.32                 |
| <b>Cr</b>        | 1.12          | 0.21                 |
| <b>Fe</b>        | 1.14          | 0.35                 |
| <b>Co</b>        | 1.13          | 0.20                 |
| <b>Ru</b>        | 1.13          | 0.28                 |

**Table S4** The comparable results of this work and the others NRR catalysts.

| <b>Catalysts</b>                                                                                                                    | $U_{onset}$ (V)        | <b>Refs.</b> |
|-------------------------------------------------------------------------------------------------------------------------------------|------------------------|--------------|
| <b>V/Ars</b>                                                                                                                        | -0.26                  | In this work |
| <b>B-B<sub>1</sub>P and B-B<sub>2</sub>P</b>                                                                                        | -0.78 and -0.92        | 1            |
| <b>Ru/ Boron</b>                                                                                                                    | -0.42                  | 2            |
| <b>Ru<sub>1</sub>@C<sub>2</sub>N, Ru<sub>1</sub>@T-C<sub>3</sub>N<sub>4</sub>, and Ru<sub>1</sub>@<math>\gamma</math>-graphynes</b> | -0.94, -0.96 and -0.98 | 3            |
| <b>W@g-C<sub>3</sub>N<sub>4</sub></b>                                                                                               | -0.35                  | 4            |
| <b>Mo@C<sub>2</sub>N</b>                                                                                                            | -0.17                  | 5            |
| <b>V@<math>\beta</math><sub>12</sub>-Boron</b>                                                                                      | -0.28                  | 6            |
| <b>B/g-C<sub>3</sub>N<sub>4</sub></b>                                                                                               | -0.20                  | 7            |

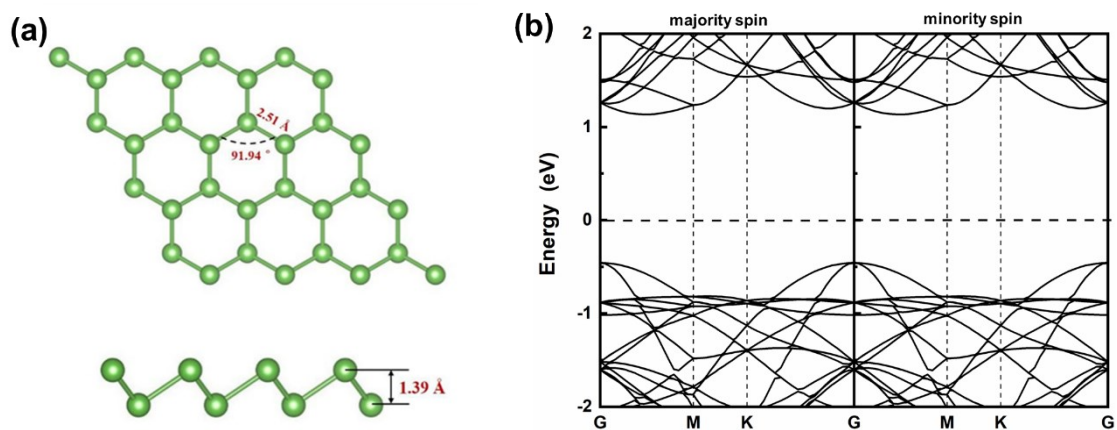

**Fig. S1** The pristine arsenene nanosheet of (a) top view and side view, and (b) the corresponding band structure (DFT-PBE level). The Fermi-level is set to be zero denoted by dash line. The green color is represented for arsenic atom.

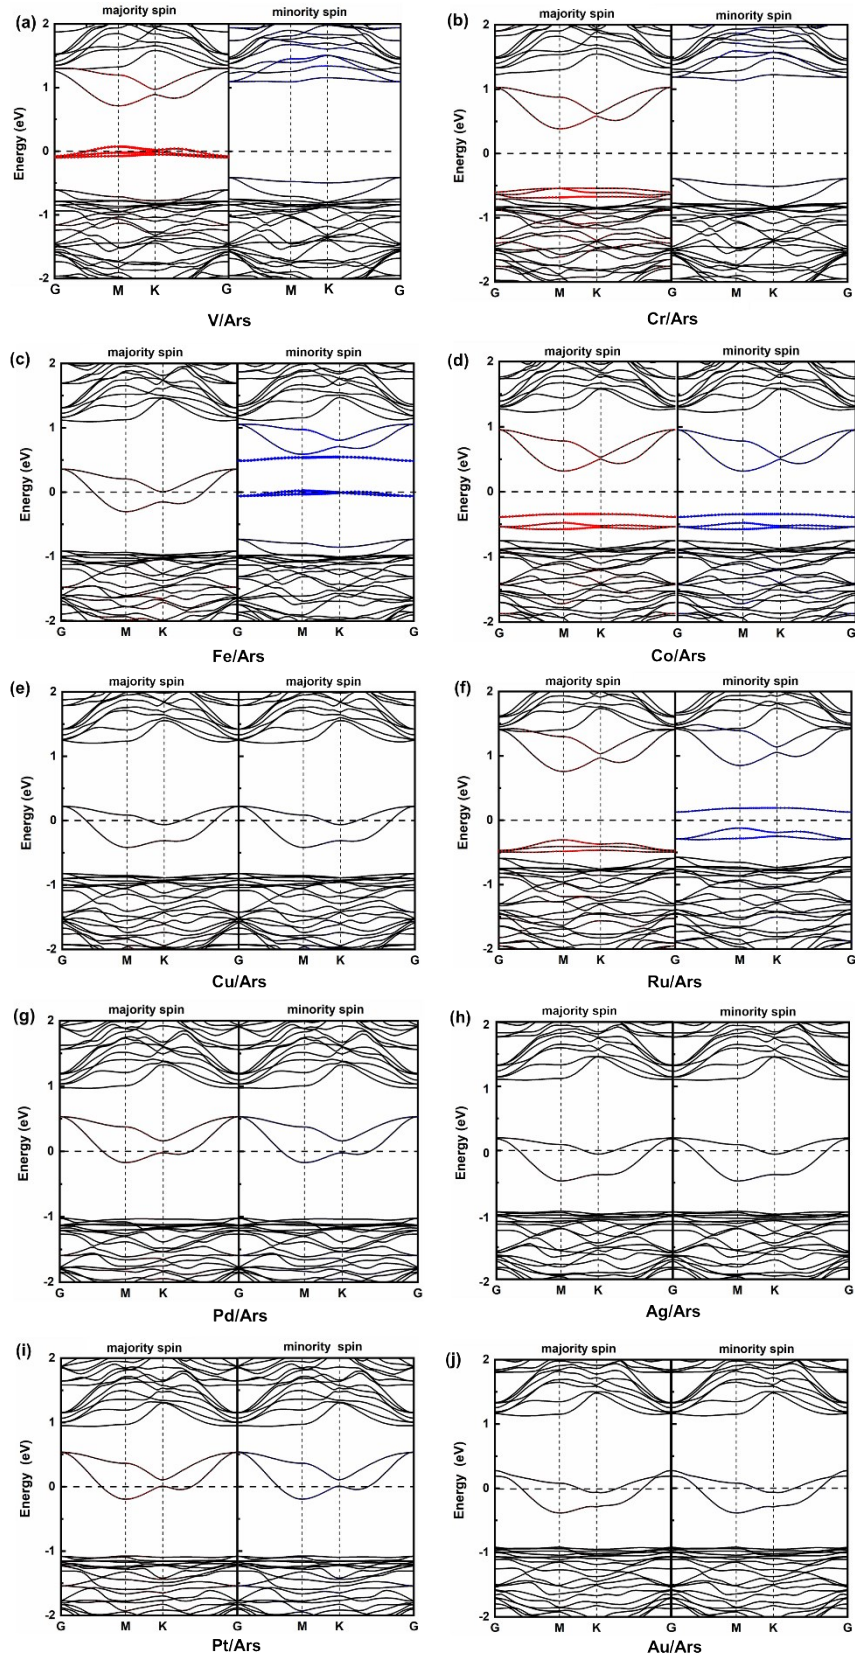

**Fig. S2** Electronic band structures (DFT-PBE level) of TM atoms (i.e., V, Cr, Fe, Co, Cu, Ru, Pd, Ag, Pt and Au) doped arsenene. The Fermi-level is indicated by the dash line, and red and blue spots represents TM contributions from majority and minority spins.

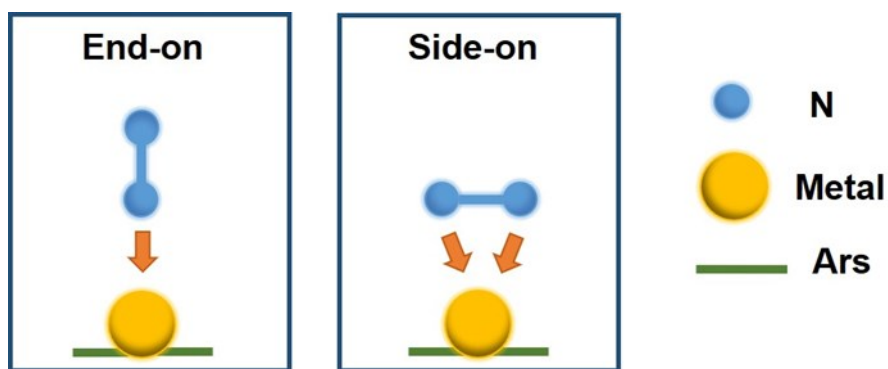

**Fig. S3** The  $N_2$  adsorption on TM/Ars with end-on and side-on configurations.

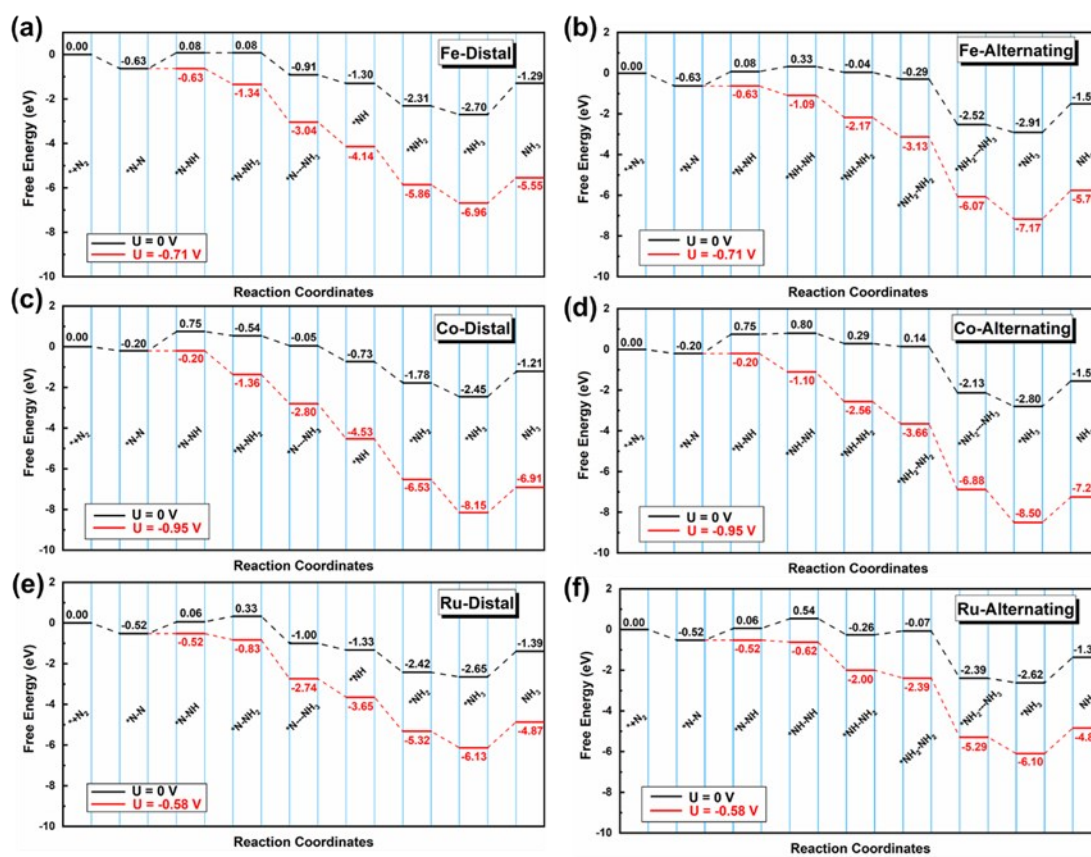

**Fig. S4** Free energies profiles for Fe-, Co-, Ru-doped arsenene nanosheet via distal ways (i.e., (a) (c) (e)) and alternating ways (i.e., (b) (d) (f)).

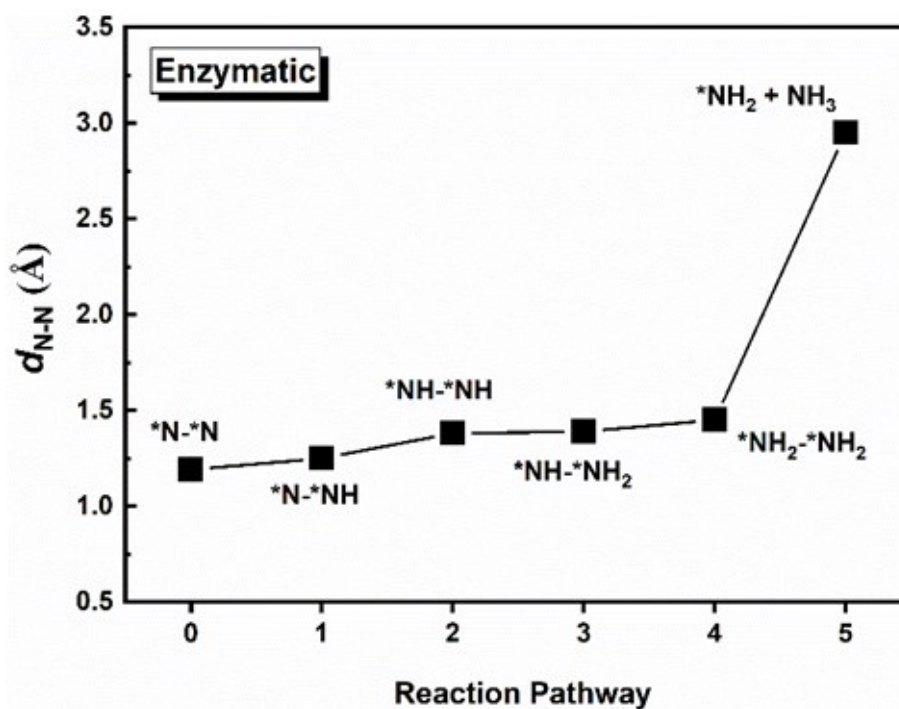

**Fig. S5** The variation of the N≡N bond length ( $d_{N-N}$ ) via the enzymatic pathway on V/Ars electrocatalyst for NRR process.

## Reference

1. Y. W. Cheng, Y. Song and Y. M. Zhang, *Phys. Chem. Chem. Phys.*, 2019, **21**, 24449-24457.
2. C. W. Liu, Q. Y. Li, J. Zhang, Y. G. Jin, D. R. MacFarlane and C. H. Sun, *J. Mater. Chem. A*, 2019, **7**, 4771-4776.
3. Y. Y. Cao, Y. J. Gao, H. Zhou, X. L. Chen, H. Hu, S. W. Deng, X. Zhong, G. L. Zhuang and J. G. Wang, *Adv. Theor. Simul.*, 2018, **1**, 1800018.
4. Z. Chen, J. X. Zhao, C. R. Cabrera and Z. F. Chen, *Small Methods*, 2019, **3**, 1800368.
5. Z. X. Wang, Z. G. Yu and J. X. Zhao, *Phys. Chem. Chem. Phys.*, 2018, **20**, 12835-12844.
6. H.-R. Zhu, Y.-L. Hu, S.-H. Wei and D.-Y. Huai, *J. Phys. Chem. C*, 2019, **123**, 4274-4281.
7. C. Ling, X. Niu, Q. Li, A. Du and J. Wang, *J. Am. Chem. Soc.*, 2018, **140**, 14161-14168.
